# Supplementary material
Source: Springer Nature journal article supplement (https://www.springermedizin.de/resource/supplementary/12943_2013_1159_MOESM5_ESM.pdf/9552634)

A

*Klf4*<sup>+/+</sup>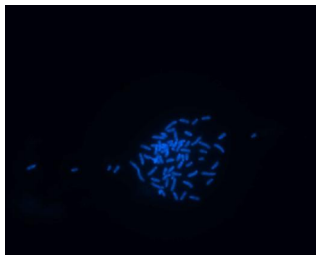*Klf4*<sup>-/-</sup>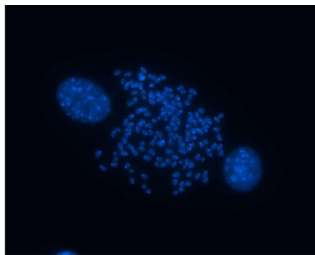

B

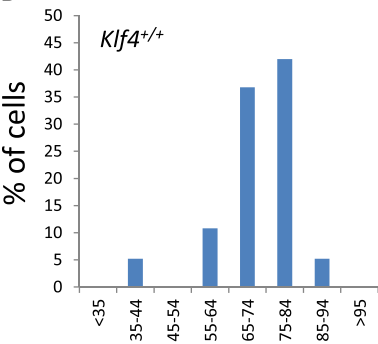

C

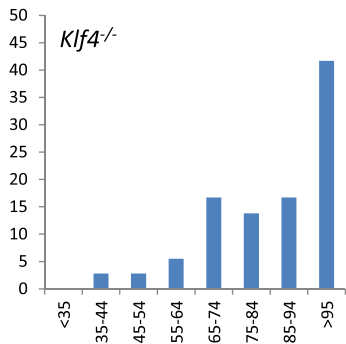

D

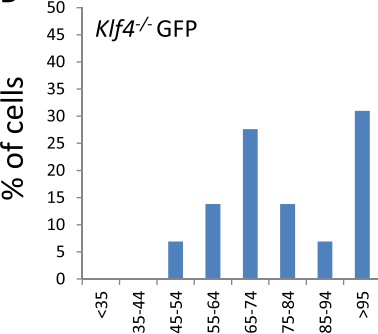

E

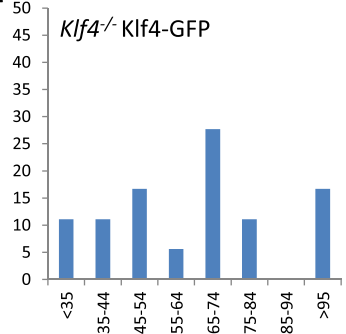

Number of chromosomes

Number of chromosomes

Supplement: MOESM5 [file 9552634]
